# Supplementary material for: Specificity improvement of Invader assay by introducing an artificially mismatched base into the probe
Source: Royal Society of Chemistry journal article supplement (doi:10.1039/c5ay02272j), 2015-01-01
Supplement: c5ay02272j1.pdf [file c5ay02272j1.pdf]

Specificity Improvement of Invader Assay by Introducing an Artificially Mismatched Base into the  
Probe

Yunlong Liu <sup>a,†</sup>, Bingjie Zou <sup>a,†</sup>, Haiping Wu <sup>b</sup>, Yanan Chu <sup>a</sup>, Guohua Zhou <sup>a, b \*</sup>

<sup>a</sup> *Department of Pharmacology, Jinling Hospital, Medical School of Nanjing University, Nanjing  
210002, China;*

<sup>b</sup> *Huadong Research Institute for Medicine and Biotechnics, Nanjing 210002, China;*

<sup>c</sup> *State Key Laboratory of Analytical Chemistry for Life Science, Department of Chemistry, Nanjing  
University, Nanjing 210093, China.*

Corresponding author at: Department of Pharmacology, Jinling Hospital, Medical School of Nanjing  
University, No. 305, East Zhongshan Road, Nanjing 210002, PR China.

E-mail address: [ghzhou@nju.edu.cn](mailto:ghzhou@nju.edu.cn)

†: These authors contributed equally to this work.

## Supplementary

**Table S1** Comparison between Invader assay and other close-tube techniques for SNP detection.

| Methods                       | Experiment set-up * | Specificity | Dye-labelled reporter |
|-------------------------------|---------------------|-------------|-----------------------|
| Invader assay                 | ++                  | +++++       | Universal             |
| Real-time PCR (TaqMan™)       | +++++               | +++         | SNP-specific          |
| Allele-specific amplification | ++++                | ++++        | SNP-specific          |
| Allele-specific ligation      | +++++               | +++++       | SNP-specific          |

\*The number of “+” means the difficulty for setting up an experiment for detecting SNPs.

**Table S2** Oligonucleotides used for PCR or Invader reaction.

| Name                | Sequence (5'-3')                                                                  | T <sub>m</sub> (°C) |
|---------------------|-----------------------------------------------------------------------------------|---------------------|
| FRET-1              | VIC-TCT T (BHQ1) AG CCG GTT TTC CGG CTA AGA<br>CCT CGG CGC G-C6-NH <sub>2</sub>   |                     |
| FRET-2              | FAM-TCT T (BHQ1) AG CCG GTT TTC CGG CTA AGA<br>CTC CGC GTC CGT-C6-NH <sub>2</sub> |                     |
| <i>ALDH2*2-F</i>    | CCG GGA GTT GGG CGA GTA C                                                         | 70.1                |
| <i>ALDH2*2-R</i>    | GCC CCC AGC AGG TCC C                                                             | 71.6                |
| <i>ALDH2*2-UP</i>   | GGG CTG CAG GCA TAC ACT T                                                         | 69.0                |
| <i>ALDH2*2-WP-1</i> | <u>CGC GCC GAG GGA</u> AGT GAA AAC TGT GAG TG-<br>PO <sub>3</sub>                 | 62.3                |
| <i>ALDH2*2-WP-2</i> | <u>CGC GCC GAG GGg</u> AGT GAA AAC TGT GAG TG-PO <sub>3</sub>                     | 59.6                |
| <i>ALDH2*2-WP-3</i> | <u>CGC GCC GAG GGA</u> gGT GAA AAC TGT GAG TG-PO <sub>3</sub>                     | 58.8                |
| <i>ALDH2*2-WP-4</i> | <u>CGC GCC GAG GGA</u> AaT GAA AAC TGT GAG TG-PO <sub>3</sub>                     | 56.9                |
| <i>ALDH2*2-WP-5</i> | <u>CGC GCC GAG GGA</u> AGT GAA AAC TGT GAG gG -<br>PO <sub>3</sub>                | 60.1                |
| <i>ALDH2*2-WP-6</i> | <u>CGC GCC GAG GGc</u> AGT GAA AAC TGT GAG TG-PO <sub>3</sub>                     | 57.4                |
| <i>ALDH2*2-WP-7</i> | <u>CGC GCC GAG GGt</u> AGT GAA AAC TGT GAG TG-PO <sub>3</sub>                     | 57.2                |
| <i>ALDH2*2-MP</i>   | <u>ACG GAC GCG GAG</u> AAA GTG AAA ACT GTG AGT<br>G-PO <sub>3</sub>               | 62.6                |

Notes: FRET-1, 2 are fluorescence resonance energy transfer (FRET) probes used for reporting wild-type and mutant in Invader reactions, respectively. *ALDH2\*2-F*, *R* are paired PCR primers. *ALDH2\*2-UP* is an invasive oligo used for Invader reactions. *ALDH2\*2-WP* (Wild Probe), *MP* (Mutant Probe) are detection probes for wild-type and mutant respectively. Underlined nucleotides are sequence-tags for different alleles. Italic lowercase are artificially mismatched bases.

## Supplementary Figure Captions

**Fig. S1** Fluorescence signals of *ALDH2*\*2 polymorphisms assay. A: Fluorescence intensities of three genotypes detected by end-point Invader Plus assay. The signal of VIC was specific to allele \*1 and the signal of FAM was specific to allele \*2. B: Fluorescence intensity curves of an *ALDH2* \*2\*2 homozygote by real-time Invader Plus assay.

**Fig. S2** The real-time fluorescence intensity curves of *ALDH2* \*2\*2 homozygotes by using different concentrations of *Afu* flap endonuclease. a-e were specific signals detected by using 6.68, 2.67, 1.34, 0.89, 0.67 ng/μL *Afu* flap endonuclease, respectively. a'-e' were non-specific signals detected by allele\*1-specific probes when using 6.68, 2.67, 1.34, 0.89, 0.67 ng/μL *Afu* flap endonuclease, respectively. f and f' were blank controls.

**Fig. S3** The real-time fluorescence signal curves of an *ALDH2* \*1\*1 homozygotes and a \*2\*2 homozygotes with different concentrations of probe 1 for allele \*1. a-c were specific signals of a \*1\*1 homozygotes with 500, 250, 125 nmol/L probe 1, respectively. a'-c' were non-specific signals of a \*2\*2 homozygotes with 500, 250, 125 nmol/L probe 1, respectively.

**Fig. S4** The distribution of Allele\*1 : Allele\*2 ratios using the complementary probe of WP-1 (A) and the mismatched probe of WP-2 (B). The FOZ value and the ratio can be calculated as following

formulas:  $FOZ = \frac{\text{Raw counts from sample}}{\text{Raw counts from No Template Control}}$ ,  $Ratio = \frac{(\text{Net Allele * 1 FOZ})}{(\text{Net Allele * 2 FOZ})}$ . The Net

Allele FOZ=FOZ-1.

**Fig. S5** The typical results of the three genotypes using commercial Sanger sequencing (Left) and the real-time improved-Invader Plus method (Right). The arrows show the *ALDH2\*2* polymorphism site in Sanger sequencing.

Supplementary Figures

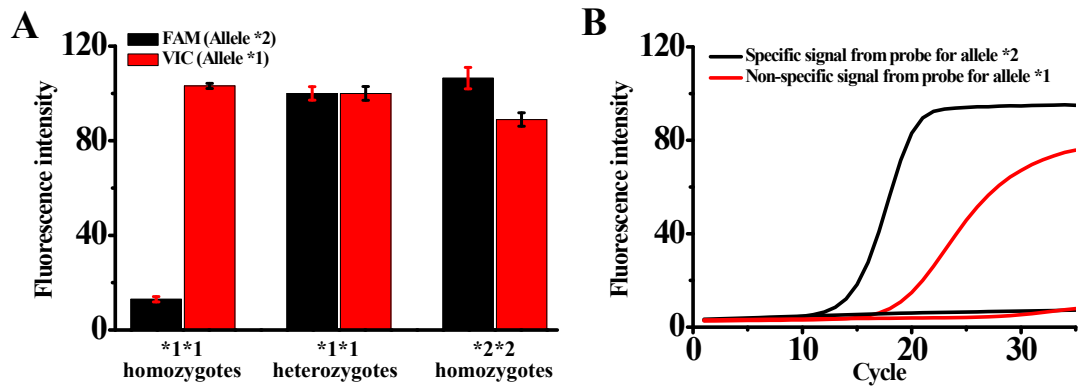

**Fig. S1** Fluorescence signals of *ALDH2*\*2 polymorphisms assay. A: Fluorescence intensities of three genotypes detected by end-point Invader Plus assay. The signal of VIC was specific to allele \*1 and the signal of FAM was specific to allele \*2. B: Fluorescence intensity curves of an *ALDH2* \*2\*2 homozygote by real-time Invader Plus assay.

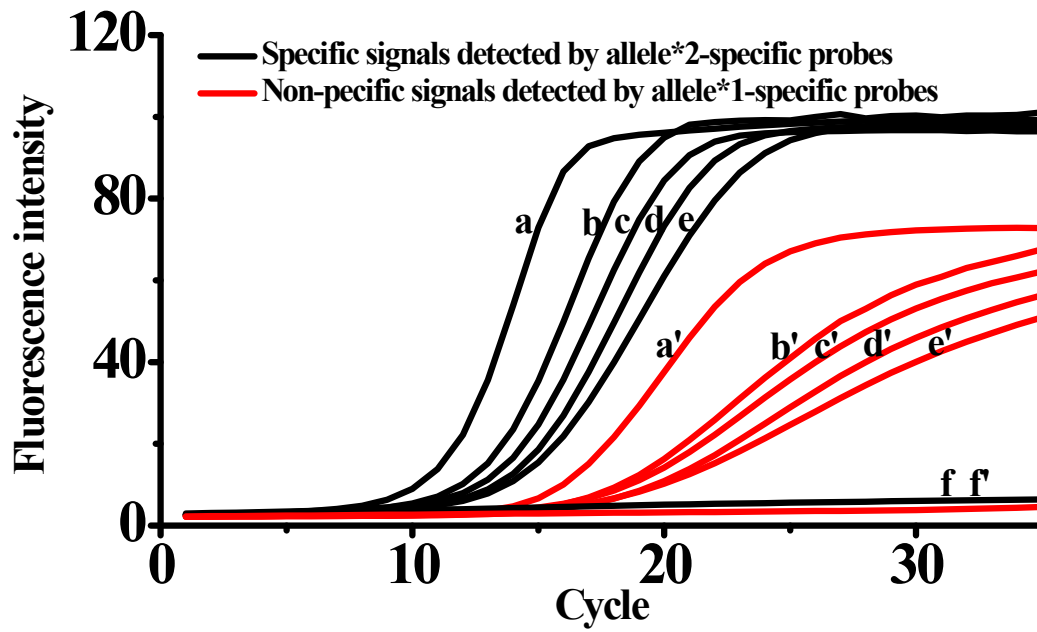

**Fig. S2** The real-time fluorescence intensity curves of *ALDH2* \*2\*2 homozygotes by using different concentrations of *Afu* flap endonuclease. a-e were specific signals detected by using 6.68, 2.67, 1.34, 0.89, 0.67 ng/ $\mu$ L *Afu* flap endonuclease, respectively. a'-e' were non-specific signals detected by allele\*1-specific probes when using 6.68, 2.67, 1.34, 0.89, 0.67 ng/ $\mu$ L *Afu* flap endonuclease, respectively. f and f' were blank controls.

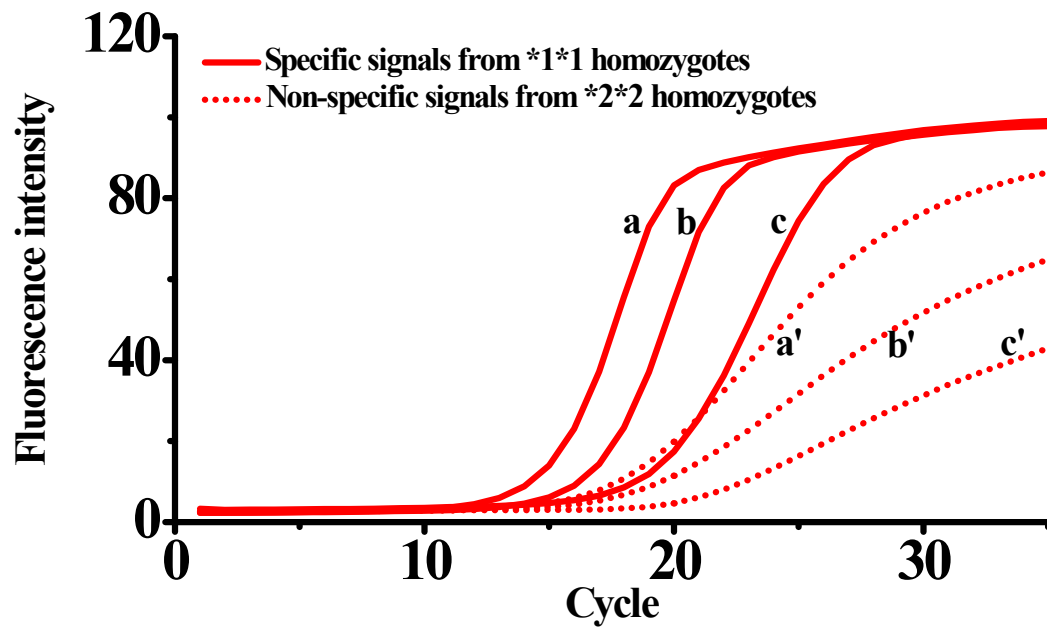

**Fig. S3** The real-time fluorescence signal curves of an *ALDH2* \*1\*1 homozygotes and a \*2\*2 homozygotes with different concentrations of probe 1 for allele \*1. a-c were specific signals of a \*1\*1 homozygotes with 500, 250, 125 nmol/L probe 1, respectively. a'-c' were non-specific signals of a \*2\*2 homozygotes with 500, 250, 125 nmol/L probe 1, respectively.



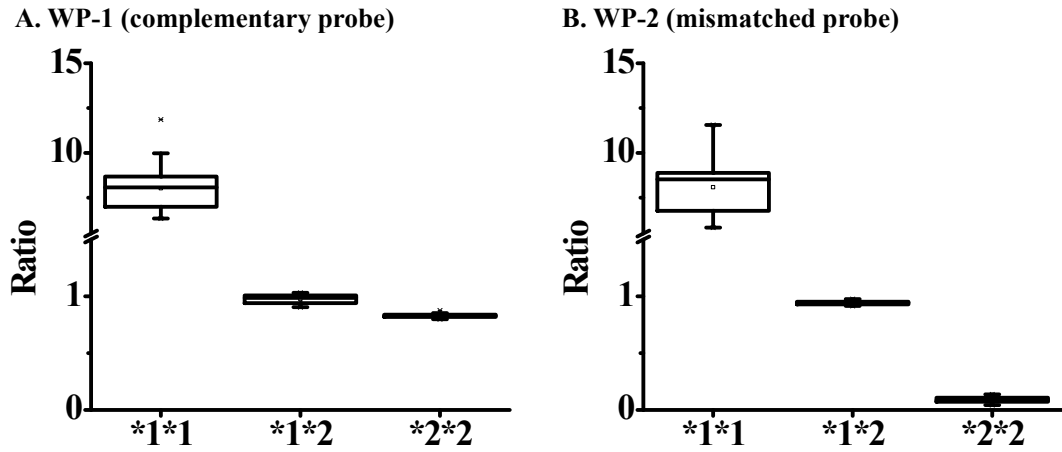

**Fig. S4** The distribution of Allele\*1 : Allele\*2 ratios using the complementary probe of WP-1 (A)

and the mismatched probe of WP-2 (B). The FOZ value and the ratio can be calculated as

following formulas:

$$FOZ = \frac{\text{Raw counts from sample}}{\text{Raw counts from No Template Control}}, \text{Ratio} = \frac{(\text{Net Allele * 1 FOZ})}{(\text{Net Allele * 2 FOZ})}. \text{The Net Allele}$$

FOZ=FOZ-1.

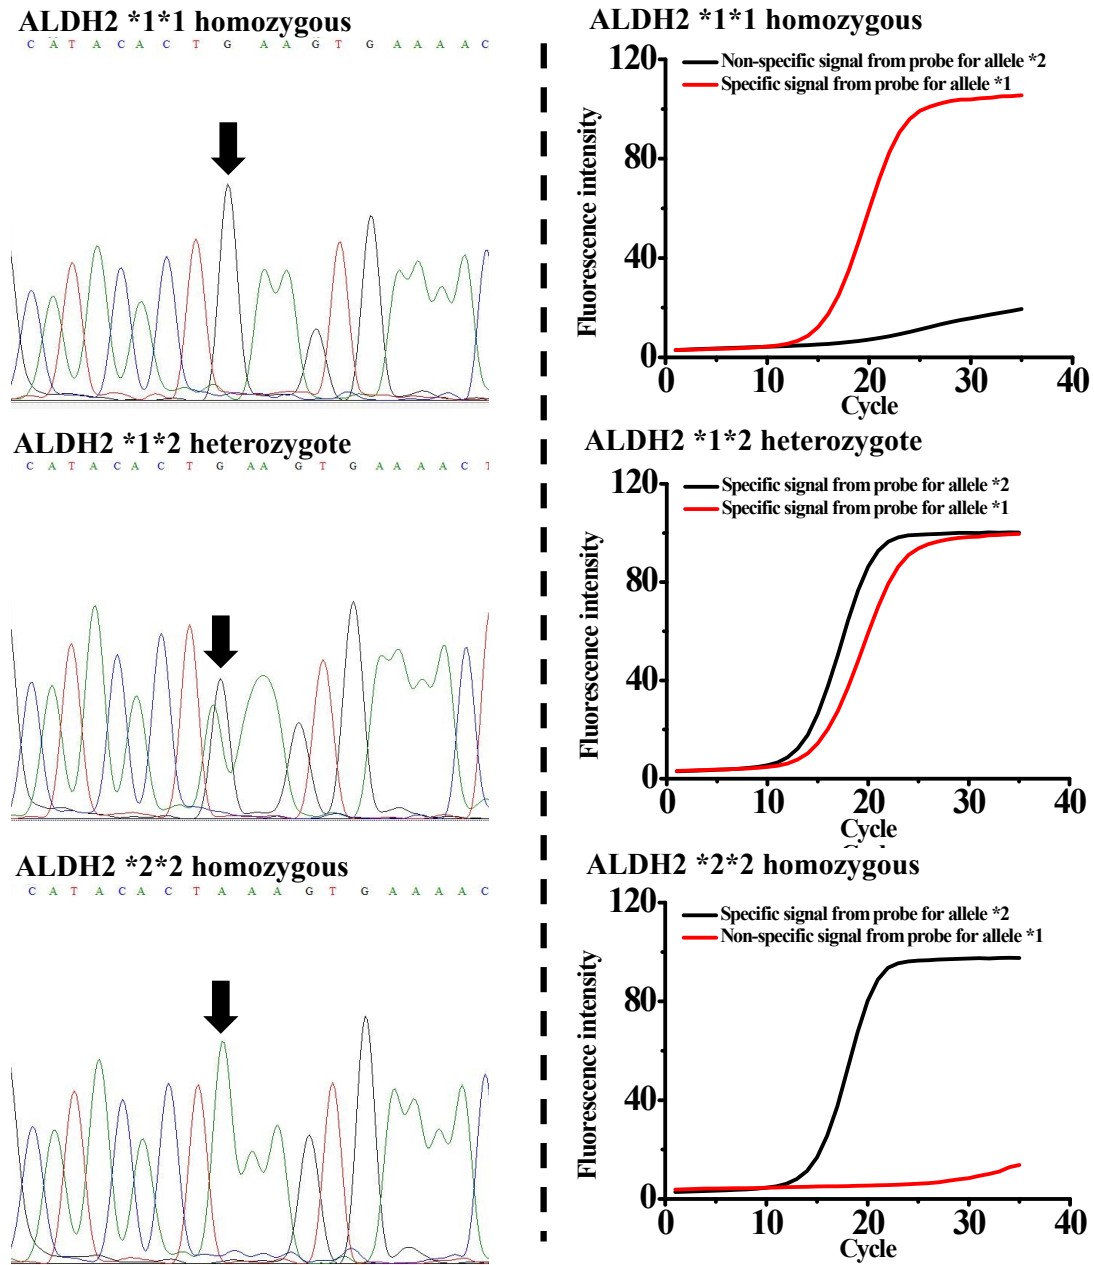

**Fig. S5** The typical results of the three genotypes using commercial Sanger sequencing (Left) and the real-time improved-Invader Plus method (Right). The arrows show the *ALDH2*\*2 polymorphism site in Sanger sequencing.
